# Supplementary material for: Multi-model ensemble projection of the global dust cycle by the end of 21st century using the Coupled Model Intercomparison Project version 6 data
Source: Copernicus journal article supplement (doi:10.5194/acp-23-7823-2023), 2023-07-14
Supplement: Supplementary file 1 [file acp-23-7823-2023-supplement.pdf]

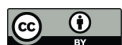

*Supplement of*

## **Multi-model ensemble projection of the global dust cycle by the end of 21st century using the Coupled Model Intercomparison Project version 6 data**

**Yuan Zhao et al.**

*Correspondence to:* Xu Yue (yuexu@nuist.edu.cn)

The copyright of individual parts of the supplement might differ from the article licence.

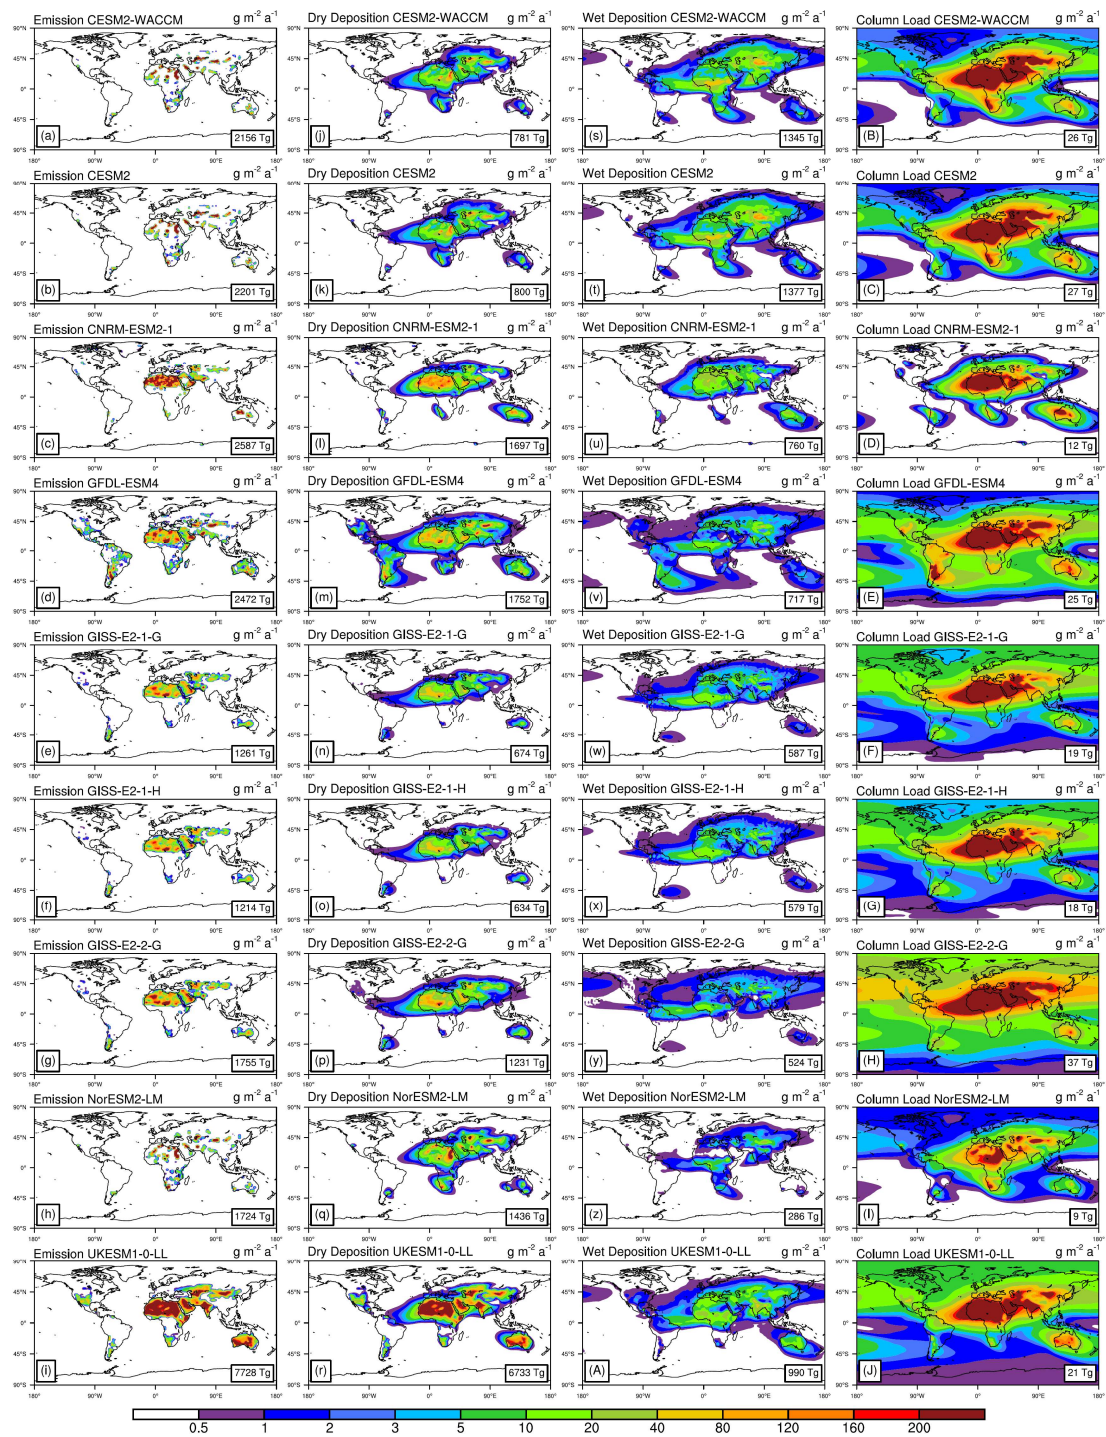

**Figure S1.** Dust emission and deposition of each selected model used in analyses at present day (2005-2014). Please notice that the median values in Fig. 4 are derived as the global total of gridded median results from CMIP6 models, and are different from the median values of the global total from CMIP6 models shown above.

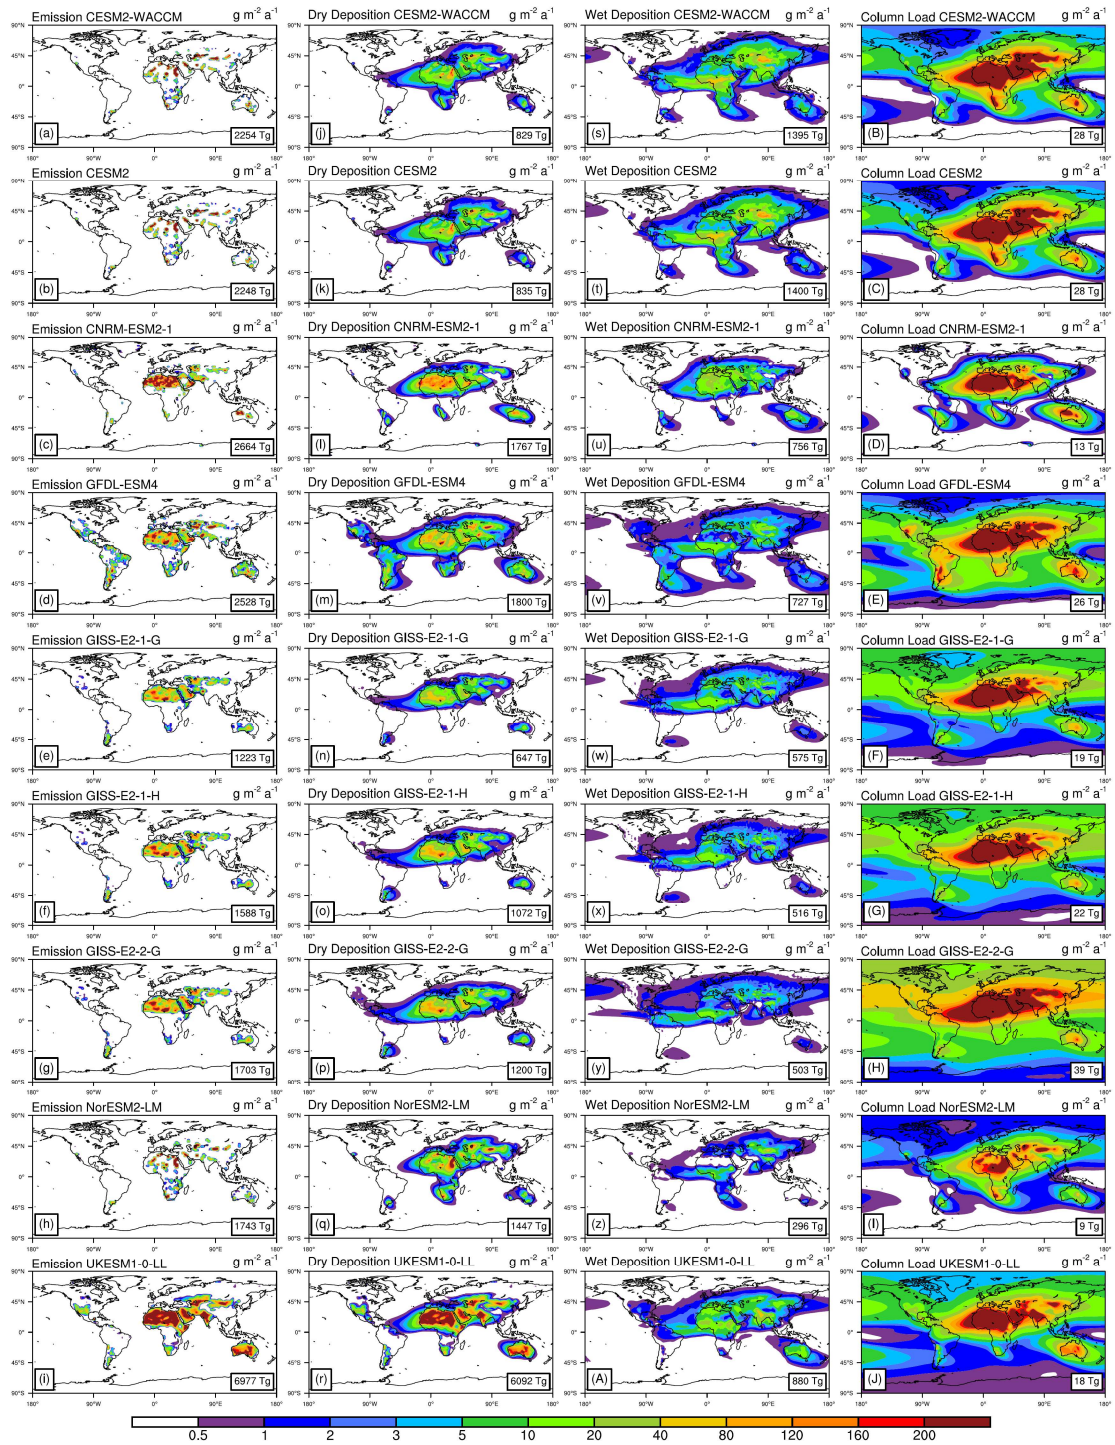

Figure S2. The same as Fig. S1 but in SSP1-2.6 scenario (2090-2099).



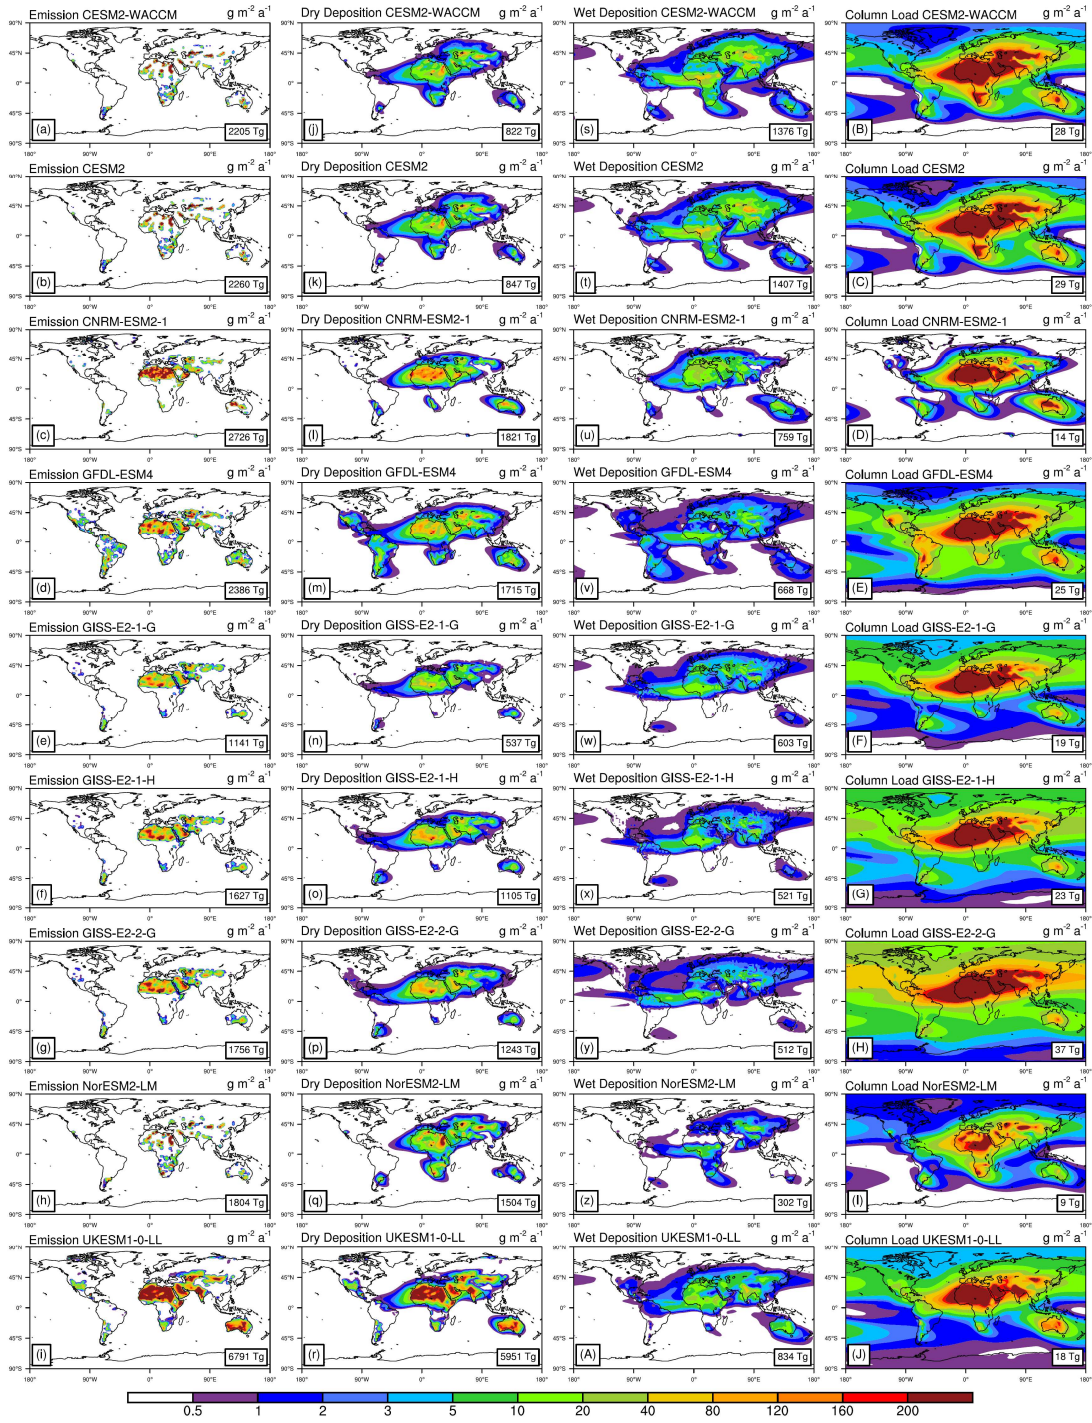

Figure S3. The same as Fig. S1 but in SSP2-4.5 scenario (2090-2099).



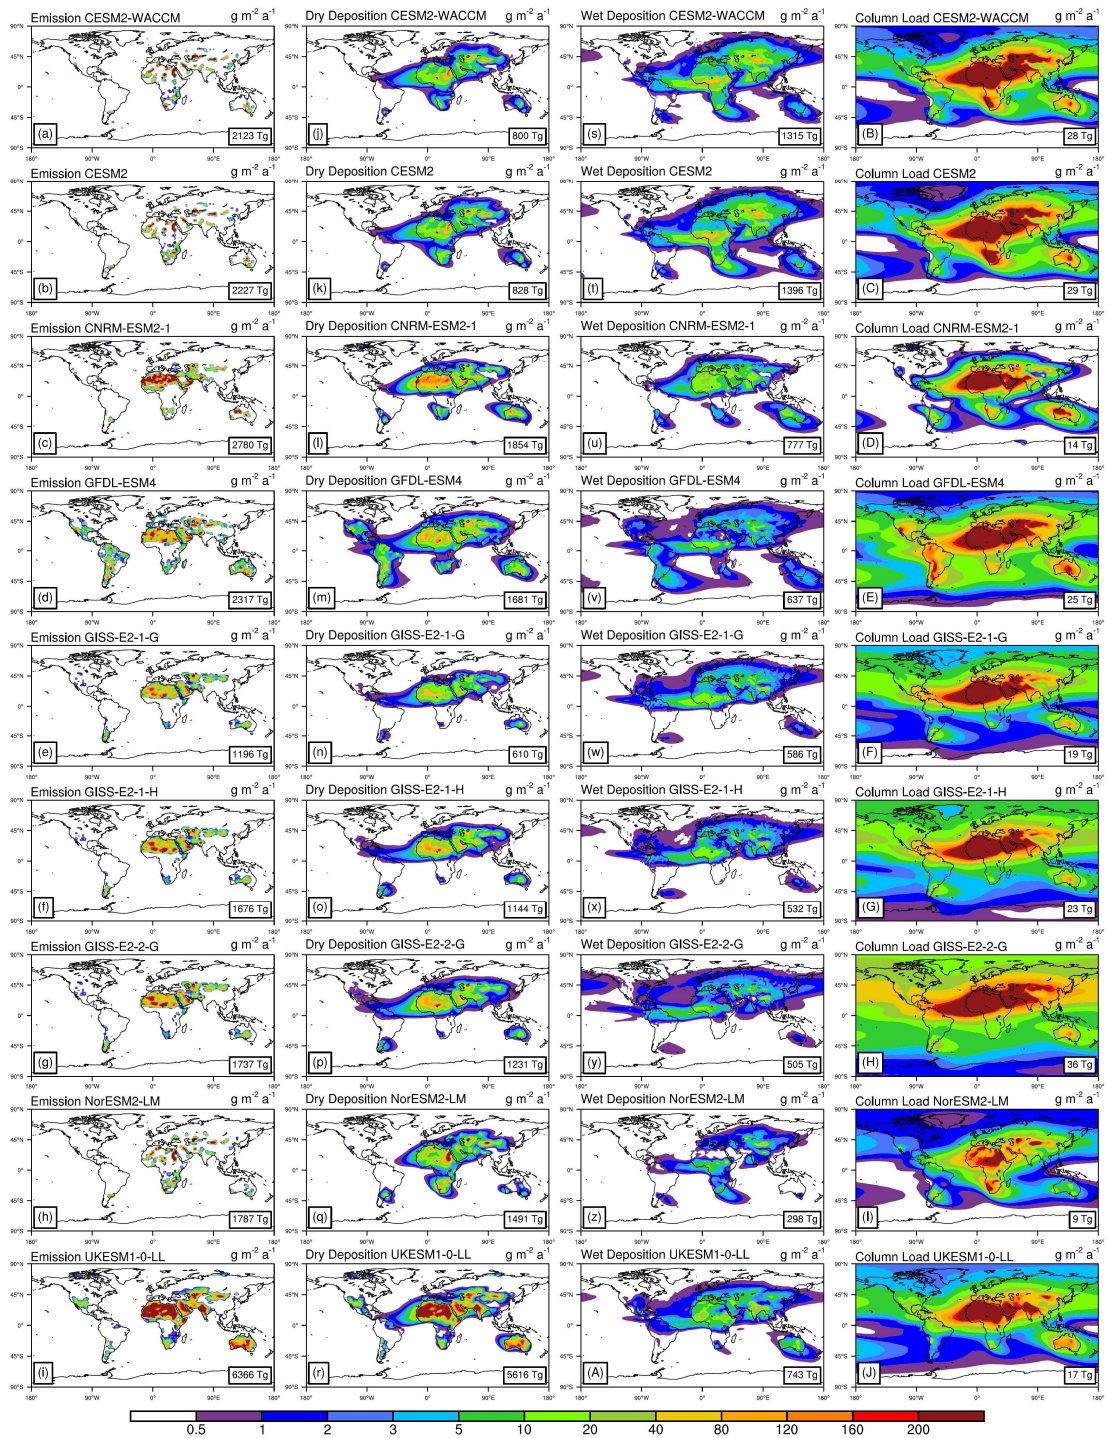

Figure S4. The same as Fig. S1 but in SSP3-7.0 scenario (2090-2099).

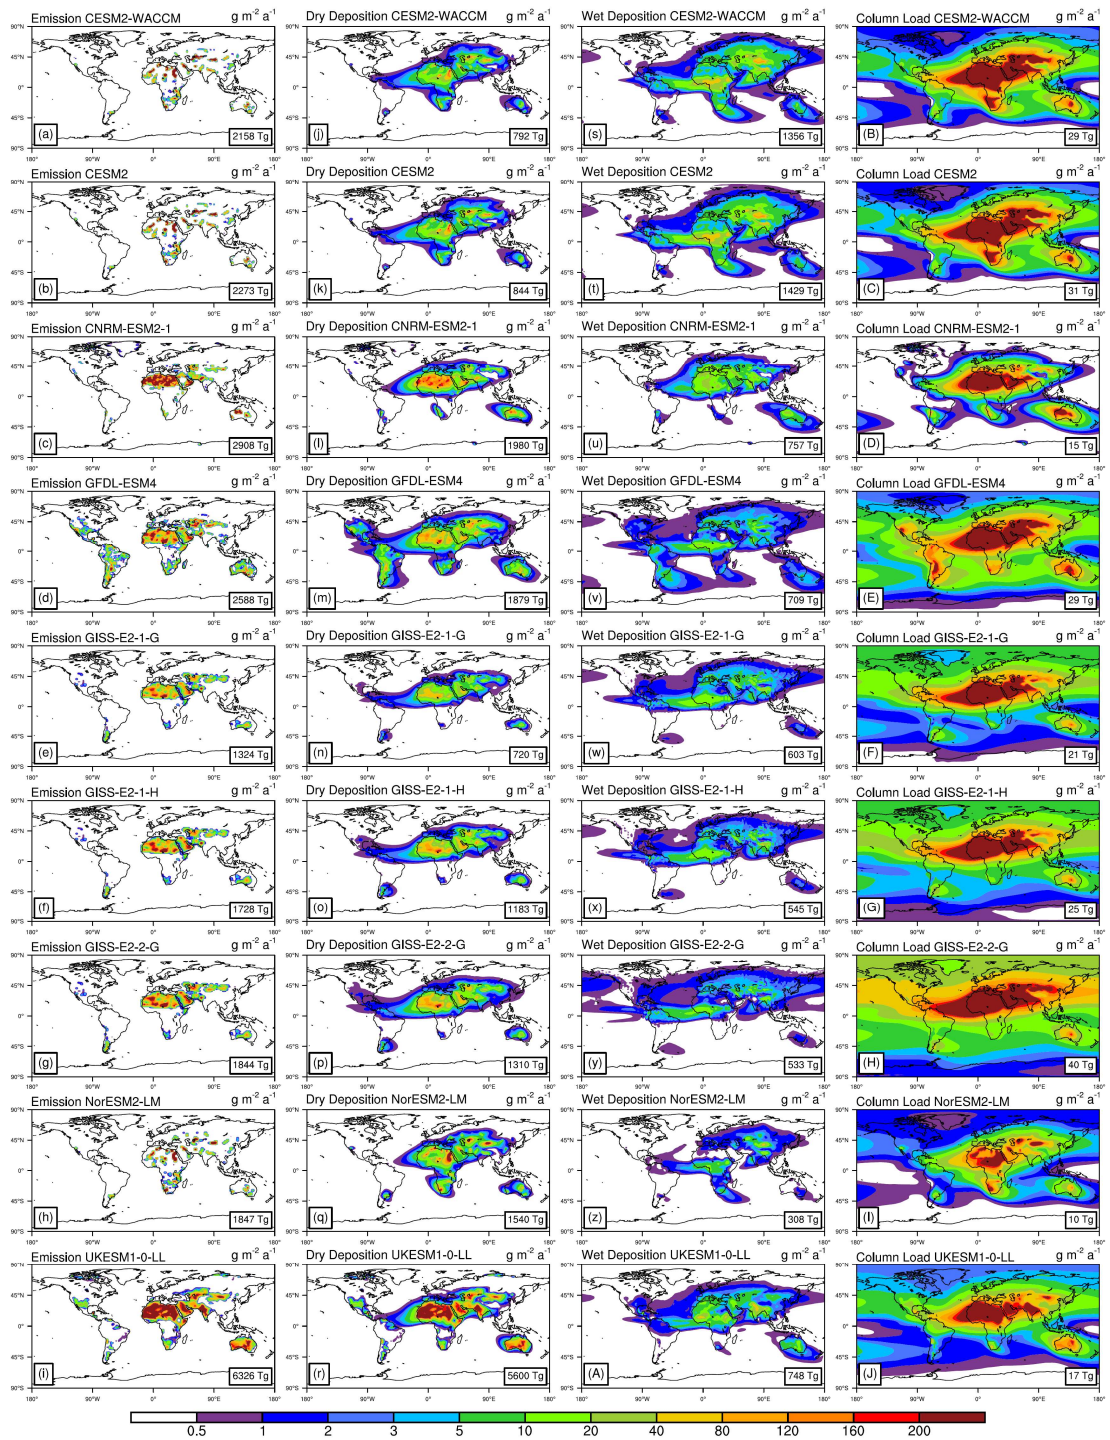

Figure S5. The same as Fig. S1 but in SSP5-8.5 scenario (2090-2099).



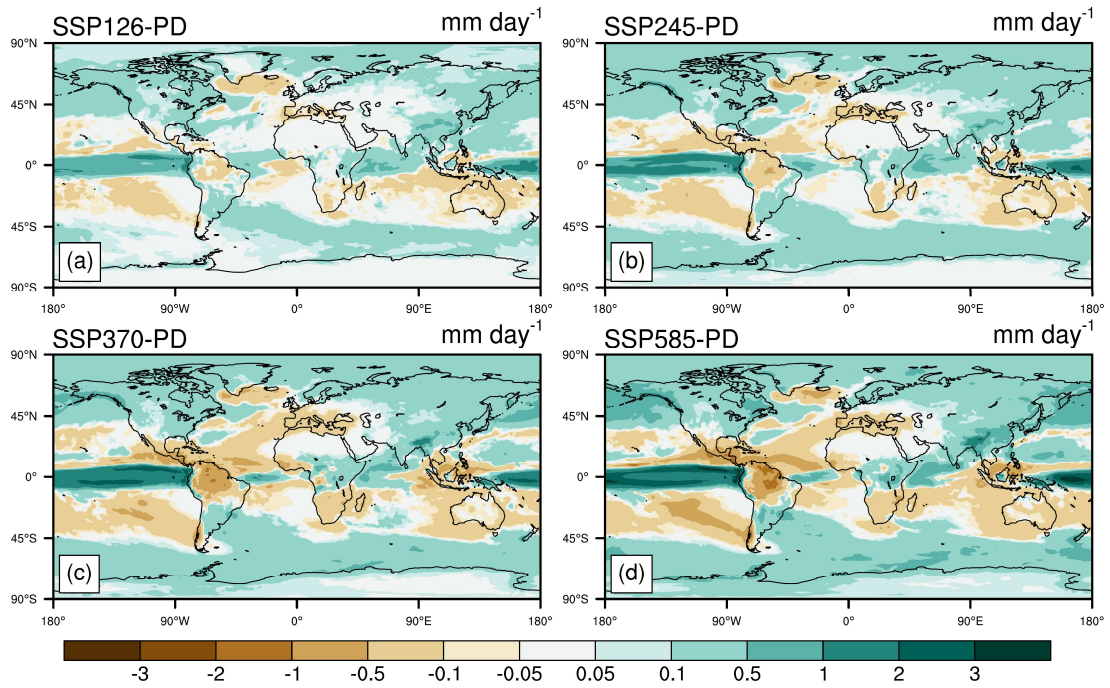

**Figure S6.** Multi-model ensemble projection of the changes in precipitation by the end of 21<sup>st</sup> century (2090-2099) relative to present day (2005-2014) under four different anthropogenic emission scenarios. Precipitation data from the nine selected climate models (Table 1) are used in the analyses.



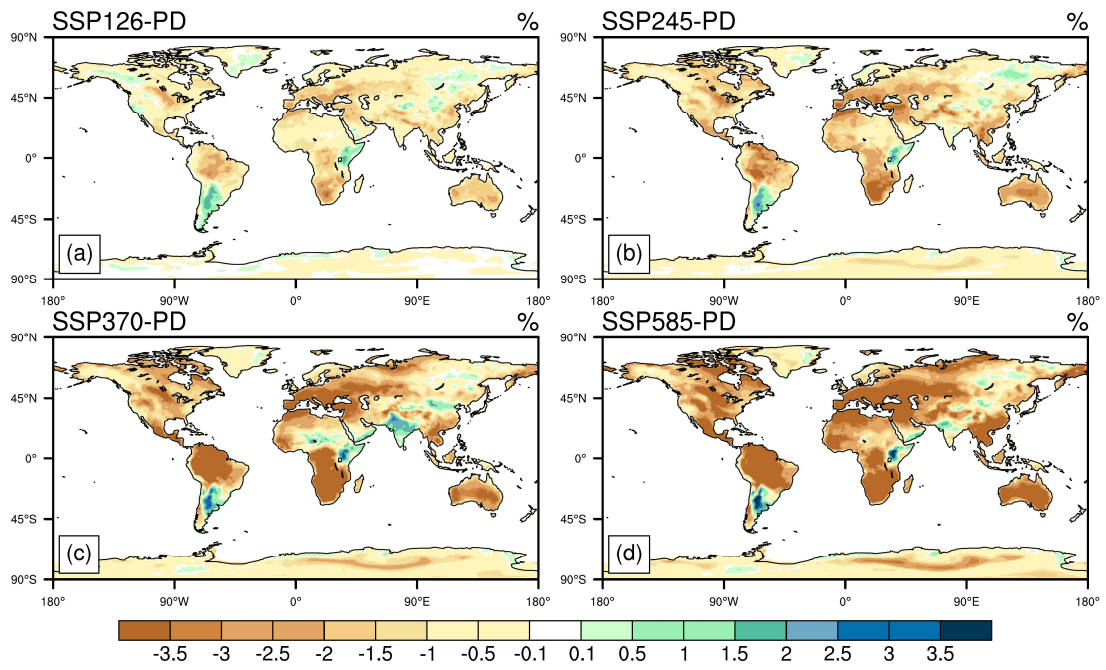

**Figure S7.** The same as Fig. S6 but for changes in relative humidity.

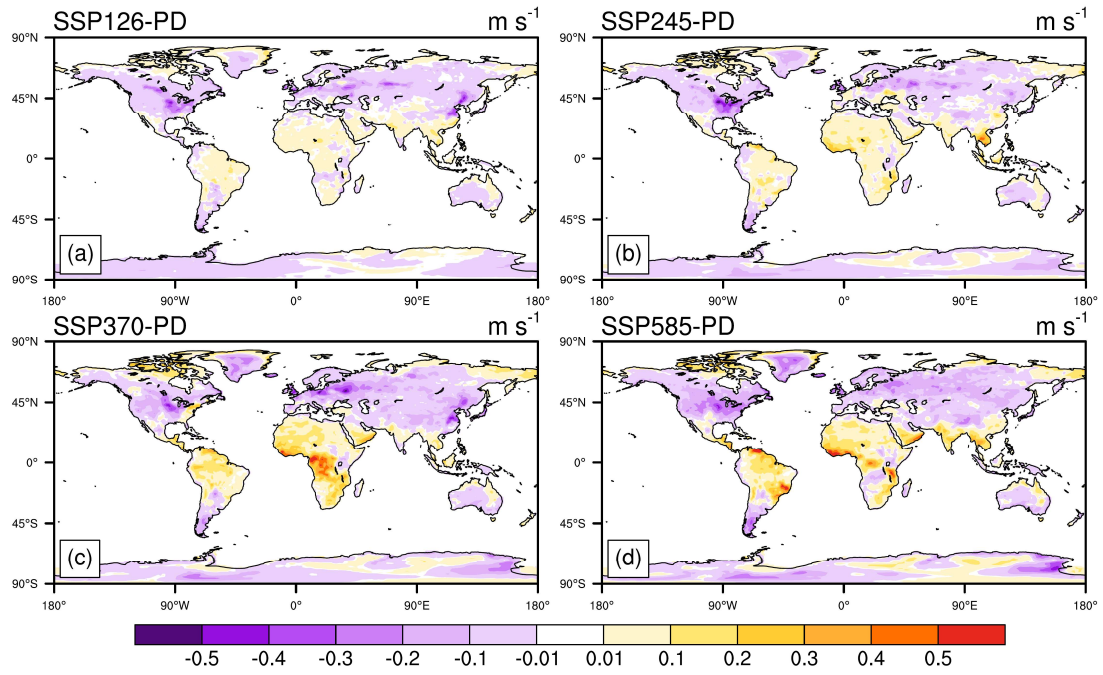

**Figure S8.** The same as Fig. S6 but for changes in surface wind speed.

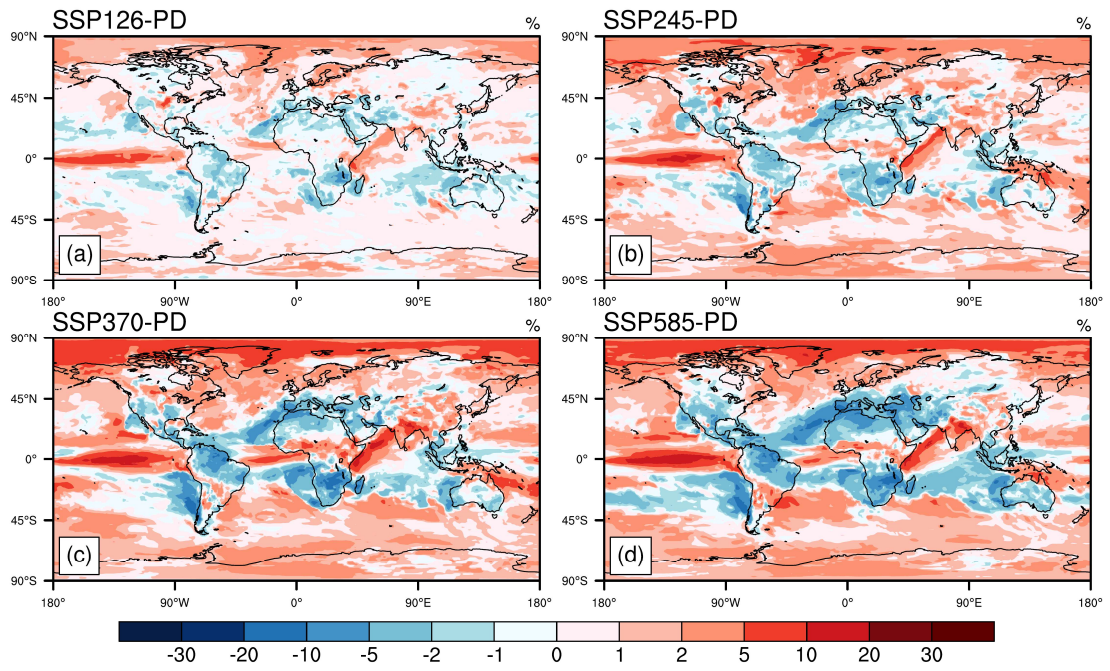

**Figure S9.** The same as Fig. S6 but for changes in the ratio of wet to total deposition.



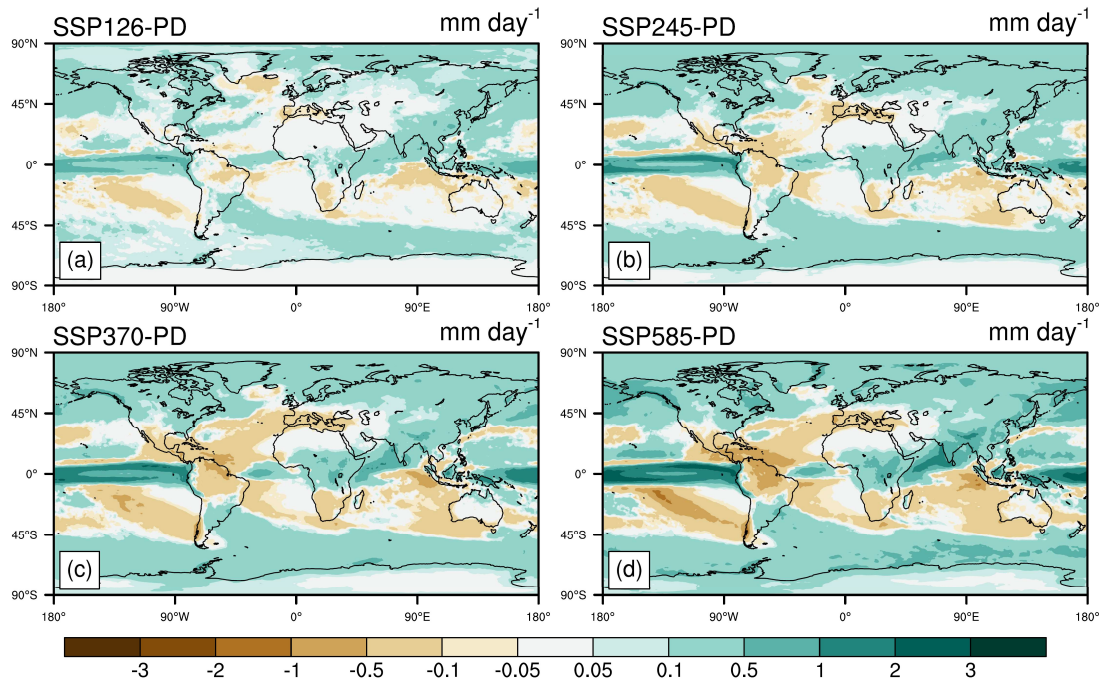

**Figure S10.** Multi-model ensemble projection of the changes in precipitation by the end of 21<sup>st</sup> century (2090-2099) relative to present day (2005-2014) under four different anthropogenic emission scenarios using all climate models in Table S7.

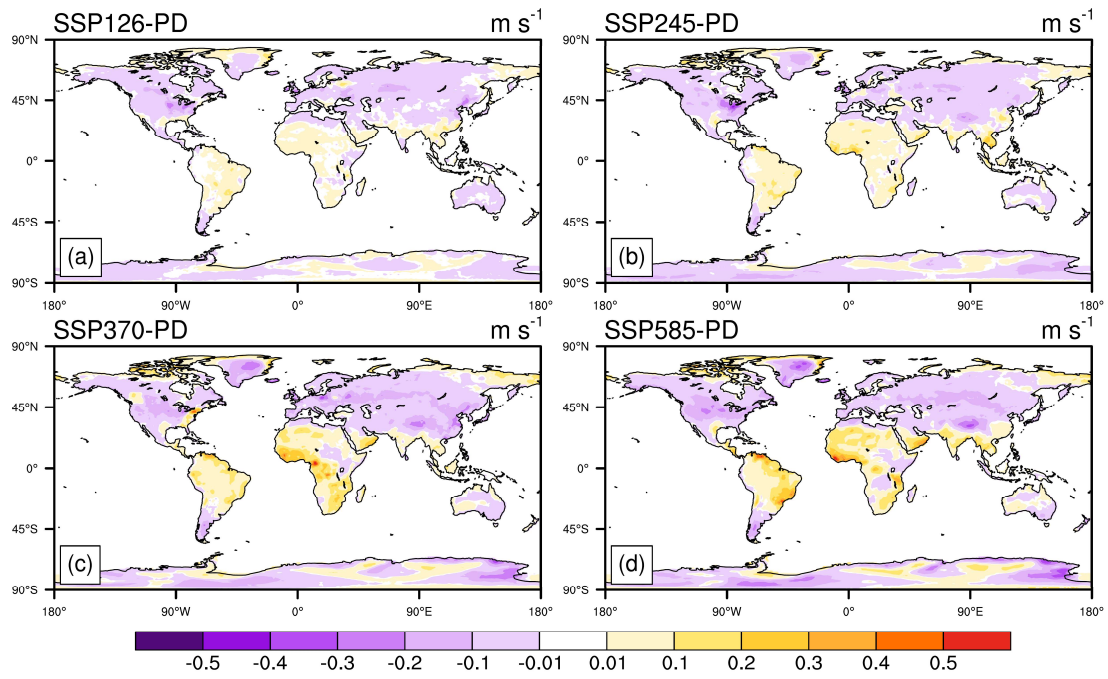

**Figure S11.** The same as Fig. S10 but for changes in surface wind speed.

**Table S1.** All ensemble runs of each available CMIP6 model for dust projection under different scenarios. The unused data are crossed out with a black line. The last access of the data information was on April 20<sup>th</sup>, 2023.

| Experiment ID      | Historical                                                          |                                                                     |                                                                     |                                                |
|--------------------|---------------------------------------------------------------------|---------------------------------------------------------------------|---------------------------------------------------------------------|------------------------------------------------|
|                    | emidust                                                             | drydust                                                             | wetdust                                                             | mmdrust                                        |
| Model (# of runs)  | Variant Label                                                       | Variant Label                                                       | Variant Label                                                       | Variant Label                                  |
| CESM2 (11)         | r[1-11]i1p1f1                                                       | r[1-11]i1p1f1                                                       | r[1-11]i1p1f1                                                       | r[1-11]i1p1f1                                  |
| CESM2-WACCM<br>(3) | r[1-3]i1p1f1                                                        | r[1-3]i1p1f1                                                        | r[1-3]i1p1f1                                                        | r[1-3]i1p1f1                                   |
| CNRM-ESM2-1<br>(3) | r[1-3]i1f1p2<br><del>r[4-5]i1f1p2</del><br><del>r[8-11]i1p1f2</del> | r[1-3]i1f1p2<br><del>r[4-5]i1f1p2</del><br><del>r[8-11]i1p1f2</del> | r[1-3]i1f1p2<br><del>r[4-5]i1f1p2</del><br><del>r[8-11]i1p1f2</del> | r[1-3]i1p1f2                                   |
| GFDL-ESM4 (1)      | r1i1p1f1                                                            | r1i1p1f1                                                            | r1i1p1f1                                                            | r1i1p1f1                                       |
| NorESM2-LM (1)     | r1i1p1f1<br><del>r[2-3]i1p1f1</del>                                 | r1i1p1f1                                                            | r1i1p1f1                                                            | r1i1p1f1<br><del>r[2-3]i1p1f1</del>            |
| UKESM1-0-LL<br>(3) | r[1-3]i1p1f2<br><del>r[4-19]i1p1f2</del>                            | r[1-3]i1p1f2                                                        | r[1-3]i1p1f2                                                        | r[1-3]i1p1f2<br><del>r[4-19]i1p1f2</del>       |
| INM-CM4-8 (1)      | r1i1p1f1                                                            | r1i1p1f1                                                            | r1i1p1f1                                                            | r1i1p1f1                                       |
| INM-CM5-0 (10)     | r[1-10]i1p1f1                                                       | r[1-10]i1p1f1                                                       | r[1-10]i1p1f1                                                       | r[1-10]i1p1f1                                  |
| MIROC6 (10)        | r[1-10]i1p1f1                                                       | r[1-10]i1p1f1                                                       | r[1-10]i1p1f1                                                       | r[1-10]i1p1f1                                  |
| MIROC-ES2L<br>(31) | r[1-30]i1p1f2<br>r1i1000p1f2                                        | r[1-30]i1p1f2<br>r1i1000p1f2                                        | r[1-30]i1p1f2<br>r1i1000p1f2                                        | r[1-30]i1p1f2<br>r1i1000p1f2                   |
| MRI-ESM2-0<br>(12) | r[1-10]i1p1f1<br>r1i2p1f1<br>r1i1000p1f1                            | r[1-10]i1p1f1<br>r1i2p1f1<br>r1i1000p1f1                            | r[1-10]i1p1f1<br>r1i2p1f1<br>r1i1000p1f1                            | r[1-10]i1p1f1<br>r1i2p1f1<br>r1i1000p1f1       |
| GISS-E2-1-G (19)   | r[1-10]i1p3f1<br>r[1-4]i1p5f1<br>r[6-10]i1p5f1                      | r[1-10]i1p3f1<br>r[1-4]i1p5f1<br>r[6-10]i1p5f1                      | r[1-10]i1p3f1<br>r[1-4]i1p5f1<br>r[6-10]i1p5f1                      | r[1-10]i1p3f1<br>r[1-4]i1p5f1<br>r[6-10]i1p5f1 |
| GISS-E2-1-H (10)   | r[1-5]i1p3f1<br>r[1-5]i1p5f1                                        | r[1-5]i1p3f1<br>r[1-5]i1p5f1                                        | r[1-5]i1p3f1<br>r[1-5]i1p5f1                                        | r[1-5]i1p3f1<br>r[1-5]i1p5f1                   |
| GISS-E2-2-G (5)    | r[1-5]i1p3f1                                                        | r[1-5]i1p3f1                                                        | r[1-5]i1p3f1                                                        | r[1-5]i1p3f1                                   |
| Experiment ID      | ssp126                                                              |                                                                     |                                                                     |                                                |
| Variable           | emidust                                                             | drydust                                                             | wetdust                                                             | mmdrust                                        |
| Model (# of runs)  | Variant Label                                                       | Variant Label                                                       | Variant Label                                                       | Variant Label                                  |
| CESM2 (3)          | r4i1p1f1<br>r10i1p1f1<br>r11i1p1f1                                  | r4i1p1f1<br>r10i1p1f1<br>r11i1p1f1                                  | r4i1p1f1<br>r10i1p1f1<br>r11i1p1f1                                  | r4i1p1f1<br>r10i1p1f1<br>r11i1p1f1             |
| CESM2-WACCM<br>(1) | r1i1p1f1                                                            | r1i1p1f1                                                            | r1i1p1f1                                                            | r1i1p1f1                                       |
| CNRM-ESM2-1        | r[1-5]i1p1f2                                                        | r[1-5]i1p1f2                                                        | r[1-5]i1p1f2                                                        | r[1-5]i1p1f2                                   |



|                     |                                                                                 |                                                                                 |                                                                                 |                                                                                 |
|---------------------|---------------------------------------------------------------------------------|---------------------------------------------------------------------------------|---------------------------------------------------------------------------------|---------------------------------------------------------------------------------|
| (5)                 |                                                                                 |                                                                                 |                                                                                 |                                                                                 |
| GFDL-ESM4 (1)       | r1ilp1fl                                                                        | r1ilp1fl                                                                        | r1ilp1fl                                                                        | r1ilp1fl                                                                        |
| NorESM2-LM (1)      | r1ilp1fl                                                                        | r1ilp1fl                                                                        | r1ilp1fl                                                                        | r1ilp1fl                                                                        |
| UKESM1-0-LL<br>(5)  | r[1-4]ilp1f2<br>r8ilp1f2<br><del>r[5-7]ilp1f2</del><br><del>r[9-19]ilp1f2</del> | r[1-4]ilp1f2<br>r8ilp1f2<br><del>r[5-7]ilp1f2</del><br><del>r[9-19]ilp1f2</del> | r[1-4]ilp1f2<br>r8ilp1f2<br><del>r[5-7]ilp1f2</del><br><del>r[9-19]ilp1f2</del> | r[1-4]ilp1f2<br>r8ilp1f2<br><del>r[5-7]ilp1f2</del><br><del>r[9-19]ilp1f2</del> |
| INM-CM4-8 (1)       | r1ilp1fl                                                                        | r1ilp1fl                                                                        | r1ilp1fl                                                                        | r1ilp1fl                                                                        |
| INM-CM5-0 (1)       | r1ilp1fl                                                                        | r1ilp1fl                                                                        | r1ilp1fl                                                                        | r1ilp1fl                                                                        |
| MIROC6 (3)          | r[1-3]ilp1fl                                                                    | r[1-3]ilp1fl                                                                    | r[1-3]ilp1fl                                                                    | r[1-3]ilp1fl                                                                    |
| MIROC-ES2L<br>(10)  | r[1-10]ilp1f2                                                                   | r[1-10]ilp1f2                                                                   | r[1-10]ilp1f2                                                                   | r[1-10]ilp1f2                                                                   |
| MRI-ESM2-0 (5)      | r[1-5]ilp1fl                                                                    | r[1-5]ilp1fl                                                                    | r[1-5]ilp1fl                                                                    | r[1-5]ilp1fl                                                                    |
| GISS-E2-1-G (10)    | r[1-5]ilp3fl<br>r[1-5]ilp5fl                                                    | r[1-5]ilp3fl<br>r[1-5]ilp5fl                                                    | r[1-5]ilp3fl<br>r[1-5]ilp5fl                                                    | r[1-5]ilp3fl<br>r[1-5]ilp5fl                                                    |
| GISS-E2-1-H (5)     | r[1-5]ilp3fl                                                                    | r[1-5]ilp3fl                                                                    | r[1-5]ilp3fl                                                                    | r[1-5]ilp3fl                                                                    |
| GISS-E2-2-G (5)     | r[1-5]ilp3fl                                                                    | r[1-5]ilp3fl                                                                    | r[1-5]ilp3fl                                                                    | r[1-5]ilp3fl                                                                    |
| Experiment ID       | ssp245                                                                          |                                                                                 |                                                                                 |                                                                                 |
| Variable            | emidust                                                                         | drydust                                                                         | wetdust                                                                         | mmdust                                                                          |
| Model (# of runs)   | Variant Label                                                                   | Variant Label                                                                   | Variant Label                                                                   | Variant Label                                                                   |
| CESM2 (3)           | r4ilp1fl<br>r10ilp1fl<br>r11ilp1fl                                              | r4ilp1fl<br>r10ilp1fl<br>r11ilp1fl                                              | r4ilp1fl<br>r10ilp1fl<br>r11ilp1fl                                              | r4ilp1fl<br>r10ilp1fl<br>r11ilp1fl                                              |
| CESM2-WACCM<br>(5)  | r[1-5]ilp1fl                                                                    | r[1-5]ilp1fl                                                                    | r[1-5]ilp1fl                                                                    | r[1-5]ilp1fl                                                                    |
| CNRM-ESM2-1<br>(10) | r[1-10]ilp1f2                                                                   | r[1-10]ilp1f2                                                                   | r[1-10]ilp1f2                                                                   | r[1-10]ilp1f2                                                                   |
| GFDL-ESM4 (1)       | r1ilp1fl                                                                        | r1ilp1fl                                                                        | r1ilp1fl                                                                        | r1ilp1fl                                                                        |
| NorESM2-LM<br>(13)  | r[1-3]ilp1fl<br>r[1-10]ilp1f2                                                   | r[1-3]ilp1fl<br>r[1-10]ilp1f2                                                   | r[1-3]ilp1fl<br>r[1-10]ilp1f2                                                   | r[1-3]ilp1fl<br>r[1-10]ilp1f2                                                   |
| UKESM1-0-LL<br>(5)  | r[1-4]ilp1f2<br>r8ilp1f2<br><del>r[13-15]ilp1f2</del>                           | r[1-4]ilp1f2<br>r8ilp1f2<br><del>r[13-15]ilp1f2</del>                           | r[1-4]ilp1f2<br>r8ilp1f2<br><del>r[13-15]ilp1f2</del>                           | r[1-4]ilp1f2<br>r8ilp1f2<br><del>r[13-15]ilp1f2</del>                           |
| INM-CM4-8 (1)       | r1ilp1fl                                                                        | r1ilp1fl                                                                        | r1ilp1fl                                                                        | r1ilp1fl                                                                        |
| INM-CM5-0 (1)       | r1ilp1fl                                                                        | r1ilp1fl                                                                        | r1ilp1fl                                                                        | r1ilp1fl                                                                        |
| MIROC6 (3)          | r[1-3]ilp1fl                                                                    | r[1-3]ilp1fl                                                                    | r[1-3]ilp1fl                                                                    | r[1-3]ilp1fl                                                                    |
| MIROC-ES2L<br>(30)  | r[1-30]ilp1f2                                                                   | r[1-30]ilp1f2                                                                   | r[1-30]ilp1f2                                                                   | r[1-30]ilp1f2                                                                   |
| MRI-ESM2-0<br>(10)  | r[1-5]ilp1fl<br>r[1-5]i3p1fl                                                    | r[1-5]ilp1fl<br>r[1-5]i3p1fl                                                    | r[1-5]ilp1fl<br>r[1-5]i3p1fl                                                    | r[1-5]ilp1fl<br>r[1-5]i3p1fl                                                    |
| GISS-E2-1-G (25)    | r[1-5]ilp3fl<br>r[1-10]ilp5fl                                                   | r[1-5]ilp3fl<br>r[1-10]ilp5fl                                                   | r[1-5]ilp3fl<br>r[1-10]ilp5fl                                                   | r[1-5]ilp3fl<br>r[1-10]ilp5fl                                                   |

|                   |                                                                                   |                                               |                                               |                                                                                   |
|-------------------|-----------------------------------------------------------------------------------|-----------------------------------------------|-----------------------------------------------|-----------------------------------------------------------------------------------|
|                   | r[1-10]i1p5f2                                                                     | r[1-10]i1p5f2                                 | r[1-10]i1p5f2                                 | r[1-10]i1p5f2                                                                     |
| GISS-E2-1-H (5)   | r[1-5]i1p3f1                                                                      | r[1-5]i1p3f1                                  | r[1-5]i1p3f1                                  | r[1-5]i1p3f1                                                                      |
| GISS-E2-2-G (5)   | r[1-5]i1p3f1                                                                      | r[1-5]i1p3f1                                  | r[1-5]i1p3f1                                  | r[1-5]i1p3f1                                                                      |
| Experiment ID     | ssp370                                                                            |                                               |                                               |                                                                                   |
| Variable          | emidust                                                                           | drydust                                       | wetdust                                       | mmdrust                                                                           |
| Model (# of runs) | Variant Label                                                                     | Variant Label                                 | Variant Label                                 | Variant Label                                                                     |
| CESM2 (3)         | r4i1p1f1<br>r10i1p1f1<br>r11i1p1f1                                                | r4i1p1f1<br>r10i1p1f1<br>r11i1p1f1            | r4i1p1f1<br>r10i1p1f1<br>r11i1p1f1            | r4i1p1f1<br>r10i1p1f1<br>r11i1p1f1                                                |
| CESM2-WACCM (3)   | r[1-3]i1p1f1                                                                      | r[1-3]i1p1f1                                  | r[1-3]i1p1f1                                  | r[1-3]i1p1f1                                                                      |
| CNRM-ESM2-1 (5)   | r[1-5]i1p1f2                                                                      | r[1-5]i1p1f2                                  | r[1-5]i1p1f2                                  | r[1-5]i1p1f2                                                                      |
| GFDL-ESM4 (1)     | r1i1p1f1                                                                          | r1i1p1f1                                      | r1i1p1f1                                      | r1i1p1f1                                                                          |
| NorESM2-LM (1)    | r1i1p1f1<br><del>r[2-3]i1p1f1</del>                                               | r1i1p1f1                                      | r1i1p1f1                                      | r1i1p1f1<br><del>r[2-3]i1p1f1</del>                                               |
| UKESM1-0-LL (3)   | r[1-3]i1p1f2<br><del>r[4-8]i1p1f2</del><br><del>r[13-16]i1p1f2</del><br>r19i1p1f2 | r[1-3]i1p1f2                                  | r[1-3]i1p1f2                                  | r[1-3]i1p1f2<br><del>r[4-8]i1p1f2</del><br><del>r[13-16]i1p1f2</del><br>r19i1p1f2 |
| INM-CM4-8 (1)     | r1i1p1f1                                                                          | r1i1p1f1                                      | r1i1p1f1                                      | r1i1p1f1                                                                          |
| INM-CM5-0 (5)     | r[1-5]i1p1f1                                                                      | r[1-5]i1p1f1                                  | r[1-5]i1p1f1                                  | r[1-5]i1p1f1                                                                      |
| MIROC6 (3)        | r[1-3]i1p1f1                                                                      | r[1-3]i1p1f1                                  | r[1-3]i1p1f1                                  | r[1-3]i1p1f1                                                                      |
| MIROC-ES2L (10)   | r[1-10]i1p1f2                                                                     | r[1-10]i1p1f2                                 | r[1-10]i1p1f2                                 | r[1-10]i1p1f2                                                                     |
| MRI-ESM2-0 (5)    | r[1-5]i1p1f1                                                                      | r[1-5]i1p1f1                                  | r[1-5]i1p1f1                                  | r[1-5]i1p1f1                                                                      |
| GISS-E2-1-G (17)  | r[1-3]i1p3f2<br>r[1-4]i1p3f1<br>r[1-10]i1p5f1                                     | r[1-3]i1p3f2<br>r[1-4]i1p3f1<br>r[1-10]i1p5f1 | r[1-3]i1p3f2<br>r[1-4]i1p3f1<br>r[1-10]i1p5f1 | r[1-3]i1p3f2<br>r[1-4]i1p3f1<br>r[1-10]i1p5f1                                     |
| GISS-E2-1-H (1)   | r1i1p3f1                                                                          | r1i1p3f1                                      | r1i1p3f1                                      | r1i1p3f1                                                                          |
| GISS-E2-2-G (5)   | r[1-5]i1p3f1                                                                      | r[1-5]i1p3f1                                  | r[1-5]i1p3f1                                  | r[1-5]i1p3f1                                                                      |
| Experiment ID     | ssp585                                                                            |                                               |                                               |                                                                                   |
| Variable          | emidust                                                                           | drydust                                       | wetdust                                       | mmdrust                                                                           |
| Model (# of runs) | Variant Label                                                                     | Variant Label                                 | Variant Label                                 | Variant Label                                                                     |
| CESM2 (3)         | r4i1p1f1<br>r10i1p1f1<br>r11i1p1f1                                                | r4i1p1f1<br>r10i1p1f1<br>r11i1p1f1            | r4i1p1f1<br>r10i1p1f1<br>r11i1p1f1            | r4i1p1f1<br>r10i1p1f1<br>r11i1p1f1                                                |
| CESM2-WACCM (5)   | r[1-5]i1p1f1                                                                      | r[1-5]i1p1f1                                  | r[1-5]i1p1f1                                  | r[1-5]i1p1f1                                                                      |
| CNRM-ESM2-1 (5)   | r[1-5]i1p1f2                                                                      | r[1-5]i1p1f1                                  | r[1-5]i1p1f1                                  | r[1-5]i1p1f2                                                                      |
| GFDL-ESM4 (1)     | r1i1p1f1                                                                          | r1i1p1f1                                      | r1i1p1f1                                      | r1i1p1f1                                                                          |

|                     |                                                                            |                                                                            |                                                                            |                                                                  |
|---------------------|----------------------------------------------------------------------------|----------------------------------------------------------------------------|----------------------------------------------------------------------------|------------------------------------------------------------------|
| NorESM2-LM (1)      | r1i1p1f1                                                                   | r1i1p1f1                                                                   | r1i1p1f1                                                                   | r1i1p1f1                                                         |
| UKESM1-0-LL<br>(4)  | r[1-4]i1p1f2<br><del>r8i1p1f2</del><br><del>r[13-15]i1p1f2</del>           | r[1-4]i1p1f2                                                               | r[1-4]i1p1f2                                                               | r[1-4]i1p1f2<br><del>r8i1p1f2</del><br><del>r[13-15]i1p1f2</del> |
| INM-CM4-8 (1)       | r1i1p1f1                                                                   | r1i1p1f1                                                                   | r1i1p1f1                                                                   | r1i1p1f1                                                         |
| INM-CM5-0 (1)       | r1i1p1f1                                                                   | r1i1p1f1                                                                   | r1i1p1f1                                                                   | r1i1p1f1                                                         |
| MIROC6 (3)          | r[1-3]i1p1f1                                                               | r[1-3]i1p1f1                                                               | r[1-3]i1p1f1                                                               | r[1-3]i1p1f1                                                     |
| MIROC-ES2L<br>(10)  | r[1-10]i1p1f2                                                              | r[1-10]i1p1f2                                                              | r[1-10]i1p1f2                                                              | r[1-10]i1p1f2                                                    |
| MRI-ESM2-0 (6)      | r[1-5]i1p1f1<br>r1i2p1f1                                                   | r[1-5]i1p1f1<br>r1i2p1f1                                                   | r[1-5]i1p1f1<br>r1i2p1f1                                                   | r[1-5]i1p1f1<br>r1i2p1f1                                         |
| GISS-E2-1-G (10)    | r[1-5]i1p3f1<br>r[1-5]i1p5f1                                               | r[1-5]i1p3f1<br>r[1-5]i1p5f1                                               | r[1-5]i1p3f1<br>r[1-5]i1p5f1                                               | r[1-5]i1p3f1<br>r[1-5]i1p5f1                                     |
| GISS-E2-1-H (5)     | r[1-5]i1p3f1                                                               | r[1-5]i1p3f1                                                               | r[1-5]i1p3f1                                                               | r[1-5]i1p3f1                                                     |
| GISS-E2-2-G (5)     | r[1-5]i1p3f1                                                               | r[1-5]i1p3f1                                                               | r[1-5]i1p3f1                                                               | r[1-5]i1p3f1                                                     |
| Experiment ID       | historical                                                                 |                                                                            |                                                                            |                                                                  |
| Variable            | hurs                                                                       | pr                                                                         | sfcWind                                                                    |                                                                  |
| Model (# of runs)   | Variant Label                                                              | Variant Label                                                              | Variant Label                                                              |                                                                  |
| CESM2 (11)          | r[1-11]i1p1f1                                                              | r[1-11]i1p1f1                                                              | r[1-11]i1p1f1                                                              |                                                                  |
| CESM2-WACCM<br>(3)  | r[1-3]i1p1f1                                                               | r[1-3]i1p1f1                                                               | r[1-3]i1p1f1                                                               |                                                                  |
| CNRM-ESM2-1<br>(10) | r[1-10]i1p1f2<br><del>r11i1p1f2</del>                                      | r[1-10]i1p1f2<br><del>r11i1p1f2</del>                                      | r[1-10]i1p1f2                                                              |                                                                  |
| GFDL-ESM4 (1)       | r1i1p1f1<br><del>r[2-3]i1p1f1</del>                                        | r1i1p1f1<br><del>r[2-3]i1p1f1</del>                                        | r1i1p1f1                                                                   |                                                                  |
| NorESM2-LM (3)      | r[1-3]i1p1f1                                                               | r[1-3]i1p1f1                                                               | r[1-3]i1p1f1                                                               |                                                                  |
| UKESM1-0-LL<br>(19) | r[1-4]i1p1f2<br>r[5-7]i1p1f3<br>r[8-19]i1p1f2                              | r[1-4]i1p1f2<br>r[5-7]i1p1f3<br>r[8-19]i1p1f2                              | r[1-4]i1p1f2<br>r[5-7]i1p1f3<br>r[8-19]i1p1f2                              |                                                                  |
| INM-CM4-8 (1)       | r1i1p1f1                                                                   | r1i1p1f1                                                                   | r1i1p1f1                                                                   |                                                                  |
| INM-CM5-0 (10)      | r[1-10]i1p1f1                                                              | r[1-10]i1p1f1                                                              | r[1-10]i1p1f1                                                              |                                                                  |
| MIROC6 (50)         | r[1-50]i1p1f1                                                              | r[1-50]i1p1f1                                                              | r[1-50]i1p1f1                                                              |                                                                  |
| MIROC-ES2L<br>(31)  | r[1-30]i1p1f2<br>r1i1000p1f2                                               | r[1-30]i1p1f2<br>r1i1000p1f2                                               | r[1-30]i1p1f2<br>r1i1000p1f2                                               |                                                                  |
| MRI-ESM2-0<br>(12)  | r[1-10]i1p1f1<br>r1i2p1f1<br>r1i1000p1f1                                   | r[1-10]i1p1f1<br>r1i2p1f1<br>r1i1000p1f1                                   | r[1-10]i1p1f1<br>r1i2p1f1<br>r1i1000p1f1                                   |                                                                  |
| GISS-E2-1-G (25)    | r[1-10]i1p3f1<br>r[1-5]i1p1f3<br>r[1-4]i1p5f1<br>r[6-10]i1p5f1<br>r1i1p1f2 | r[1-10]i1p3f1<br>r[1-5]i1p1f3<br>r[1-4]i1p5f1<br>r[6-10]i1p5f1<br>r1i1p1f2 | r[1-10]i1p3f1<br>r[1-5]i1p1f3<br>r[1-4]i1p5f1<br>r[6-10]i1p5f1<br>r1i1p1f2 |                                                                  |



|                     |                                                               |                                                               |                                                               |
|---------------------|---------------------------------------------------------------|---------------------------------------------------------------|---------------------------------------------------------------|
| GISS-E2-1-H (25)    | r[1-10]i1p1f1<br>r[1-5]i1p1f2<br>r[1-5]i1p3f1<br>r[1-5]i1p5f1 | r[1-10]i1p1f1<br>r[1-5]i1p1f2<br>r[1-5]i1p3f1<br>r[1-5]i1p5f1 | r[1-10]i1p1f1<br>r[1-5]i1p1f2<br>r[1-5]i1p3f1<br>r[1-5]i1p5f1 |
| GISS-E2-2-G (11)    | r[1-6]i1p1f1<br>r[1-5]i1p3f1                                  | r[1-6]i1p1f1<br>r[1-5]i1p3f1                                  | r[1-6]i1p1f1<br>r[1-5]i1p3f1                                  |
| Experiment ID       | ssp126                                                        |                                                               |                                                               |
| Variable            | hurs                                                          | pr                                                            | sfcWind                                                       |
| Model (# of runs)   | Variant Label                                                 | Variant Label                                                 | Variant Label                                                 |
| CESM2 (3)           | r4i1p1f1<br>r10i1p1f1<br>r11i1p1f1                            | r4i1p1f1<br>r10i1p1f1<br>r11i1p1f1                            | r4i1p1f1<br>r10i1p1f1<br>r11i1p1f1                            |
| CESM2-WACCM<br>(1)  | r1i1p1f1                                                      | r1i1p1f1                                                      | r1i1p1f1                                                      |
| CNRM-ESM2-1<br>(5)  | r[1-5]i1p1f2                                                  | r[1-5]i1p1f2                                                  | r[1-5]i1p1f2                                                  |
| GFDL-ESM4 (1)       | r1i1p1f1                                                      | r1i1p1f1                                                      | r1i1p1f1                                                      |
| NorESM2-LM (1)      | r1i1p1f1                                                      | r1i1p1f1                                                      | r1i1p1f1                                                      |
| UKESM1-0-LL<br>(16) | r[1-12]i1p1f2<br>r[16-19]i1p1f2                               | r[1-12]i1p1f2<br>r[16-19]i1p1f2                               | r[1-12]i1p1f2<br>r[16-19]i1p1f2                               |
| INM-CM4-8 (1)       | r1i1p1f1                                                      | r1i1p1f1                                                      | r1i1p1f1                                                      |
| INM-CM5-0 (1)       | r1i1p1f1                                                      | r1i1p1f1                                                      | r1i1p1f1                                                      |
| MIROC6 (50)         | r[1-50]i1p1f1                                                 | r[1-50]i1p1f1                                                 | r[1-50]i1p1f1                                                 |
| MIROC-ES2L<br>(10)  | r[1-10]i1p1f2                                                 | r[1-10]i1p1f2                                                 | r[1-10]i1p1f2                                                 |
| MRI-ESM2-0 (5)      | r[1-5]i1p1f1                                                  | r[1-5]i1p1f1                                                  | r[1-5]i1p1f1                                                  |
| GISS-E2-1-G (16)    | r[1-5]i1p1f2<br>r[1-5]i1p3f1<br>r[1-5]i1p5f1<br>r10i1p1f1     | r[1-5]i1p1f2<br>r[1-5]i1p3f1<br>r[1-5]i1p5f1<br>r10i1p1f1     | r[1-5]i1p1f2<br>r[1-5]i1p3f1<br>r[1-5]i1p5f1<br>r10i1p1f1     |
| GISS-E2-1-H (10)    | r[1-5]i1p1f2<br>r[1-5]i1p3f1                                  | r[1-5]i1p1f2<br>r[1-5]i1p3f1                                  | r[1-5]i1p1f2<br>r[1-5]i1p3f1                                  |
| GISS-E2-2-G (5)     | r[1-5]i1p3f1                                                  | r[1-5]i1p3f1                                                  | r[1-5]i1p3f1                                                  |
| Experiment ID       | ssp245                                                        |                                                               |                                                               |
| Variable            | hurs                                                          | pr                                                            | sfcWind                                                       |
| Model (# of runs)   | Variant Label                                                 | Variant Label                                                 | Variant Label                                                 |
| CESM2 (3)           | r4i1p1f1<br>r10i1p1f1<br>r11i1p1f1                            | r4i1p1f1<br>r10i1p1f1<br>r11i1p1f1                            | r4i1p1f1<br>r10i1p1f1<br>r11i1p1f1                            |
| CESM2-WACCM<br>(5)  | r[1-5]i1p1f1                                                  | r[1-5]i1p1f1                                                  | r[1-5]i1p1f1                                                  |
| CNRM-ESM2-1         | r[1-10]i1p1f2                                                 | r[1-10]i1p1f2                                                 | r[1-10]i1p1f2                                                 |

|                     |                                                                              |                                                                                                                           |                                                                              |
|---------------------|------------------------------------------------------------------------------|---------------------------------------------------------------------------------------------------------------------------|------------------------------------------------------------------------------|
| (10)                |                                                                              |                                                                                                                           |                                                                              |
| GFDL-ESM4 (1)       | r1i1p1f1<br><del>r[2-3]i1p1f1</del>                                          | r1i1p1f1<br><del>r[2-3]i1p1f1</del>                                                                                       | r1i1p1f1                                                                     |
| NorESM2-LM<br>(13)  | r[1-3]i1p1f1<br>r[1-10]i1p1f2                                                | r[1-3]i1p1f1<br>r[1-10]i1p1f2                                                                                             | r[1-3]i1p1f1<br>r[1-10]i1p1f2                                                |
| UKESM1-0-LL<br>(6)  | r[1-4]i1p1f2<br>r8i1p1f2<br>r13i1p1f2                                        | r[1-4]i1p1f2<br>r8i1p1f2<br>r13i1p1f2<br><del>r[5-7]i1p1f2</del><br><del>r[9-12]i1p1f2</del><br><del>r[16-19]i1p1f2</del> | r[1-4]i1p1f2<br>r8i1p1f2<br>r13i1p1f2                                        |
| INM-CM4-8 (1)       | r1i1p1f1                                                                     | r1i1p1f1                                                                                                                  | r1i1p1f1                                                                     |
| INM-CM5-0 (1)       | r1i1p1f1                                                                     | r1i1p1f1                                                                                                                  | r1i1p1f1                                                                     |
| MIROC6 (50)         | r[1-50]i1p1f1                                                                | r[1-50]i1p1f1                                                                                                             | r[1-50]i1p1f1                                                                |
| MIROC-ES2L<br>(30)  | r[1-30]i1p1f2                                                                | r[1-30]i1p1f2                                                                                                             | r[1-30]i1p1f2                                                                |
| MRI-ESM2-0<br>(10)  | r[1-5]i1p1f1<br>r[1-5]i3p1f1                                                 | r[1-5]i1p1f1<br>r[1-5]i3p1f1                                                                                              | r[1-5]i1p1f1<br>r[1-5]i3p1f1                                                 |
| GISS-E2-1-G (36)    | r[1-10]i1p1f2<br>r[1-5]i1p3f1<br>r[1-10]i1p5f1<br>r[1-10]i1p5f2<br>r10i1p1f1 | r[1-10]i1p1f2<br>r[1-5]i1p3f1<br>r[1-10]i1p5f1<br>r[1-10]i1p5f2<br>r10i1p1f1                                              | r[1-10]i1p1f2<br>r[1-5]i1p3f1<br>r[1-10]i1p5f1<br>r[1-10]i1p5f2<br>r10i1p1f1 |
| GISS-E2-1-H (10)    | r[1-5]i1p1f2<br>r[1-5]i1p3f1                                                 | r[1-5]i1p1f2<br>r[1-5]i1p3f1                                                                                              | r[1-5]i1p1f2<br>r[1-5]i1p3f1                                                 |
| GISS-E2-2-G (5)     | r[1-5]i1p3f1                                                                 | r[1-5]i1p3f1                                                                                                              | r[1-5]i1p3f1                                                                 |
| Experiment ID       | ssp370                                                                       |                                                                                                                           |                                                                              |
| Variable            | hurs                                                                         | pr                                                                                                                        | sfcWind                                                                      |
| Model (# of runs)   | Variant Label                                                                | Variant Label                                                                                                             | Variant Label                                                                |
| CESM2 (3)           | r4i1p1f1<br>r[10-11]i1p1f1                                                   | r4i1p1f1<br>r[10-11]i1p1f1                                                                                                | r4i1p1f1<br>r[10-11]i1p1f1                                                   |
| CESM2-WACCM<br>(3)  | r[1-3]i1p1f1                                                                 | r[1-3]i1p1f1                                                                                                              | r[1-3]i1p1f1                                                                 |
| CNRM-ESM2-1<br>(5)  | r[1-5]i1p1f2                                                                 | r[1-5]i1p1f2                                                                                                              | r[1-5]i1p1f2                                                                 |
| GFDL-ESM4 (1)       | r1i1p1f1                                                                     | r1i1p1f1                                                                                                                  | r1i1p1f1                                                                     |
| NorESM2-LM (3)      | r[1-3]i1p1f1                                                                 | r[1-3]i1p1f1                                                                                                              | r[1-3]i1p1f1                                                                 |
| UKESM1-0-LL<br>(10) | r[1-8]i1p1f2<br>r16i1p1f2<br>r19i1p1f2                                       | r[1-8]i1p1f2<br>r16i1p1f2<br>r19i1p1f2                                                                                    | r[1-8]i1p1f2<br>r16i1p1f2<br>r19i1p1f2                                       |
| INM-CM4-8 (1)       | r1i1p1f1                                                                     | r1i1p1f1                                                                                                                  | r1i1p1f1                                                                     |
| INM-CM5-0 (5)       | r[1-5]i1p1f1                                                                 | r[1-5]i1p1f1                                                                                                              | r[1-5]i1p1f1                                                                 |

|                    |                                                                |                                                                |                                                                |
|--------------------|----------------------------------------------------------------|----------------------------------------------------------------|----------------------------------------------------------------|
| MIROC6 (50)        | r[1-50]i1p1f1                                                  | r[1-50]i1p1f1                                                  | r[1-50]i1p1f1                                                  |
| MIROC-ES2L<br>(10) | r[1-10]i1p1f2                                                  | r[1-10]i1p1f2                                                  | r[1-10]i1p1f2                                                  |
| MRI-ESM2-0 (5)     | r[1-5]i1p1f1                                                   | r[1-5]i1p1f1                                                   | r[1-5]i1p1f1                                                   |
| GISS-E2-1-G (27)   | r[1-10]i1p1f2<br>r[1-4]i1p3f1<br>r[1-3]i1p3f2<br>r[1-10]i1p5f1 | r[1-10]i1p1f2<br>r[1-4]i1p3f1<br>r[1-3]i1p3f2<br>r[1-10]i1p5f1 | r[1-10]i1p1f2<br>r[1-4]i1p3f1<br>r[1-3]i1p3f2<br>r[1-10]i1p5f1 |
| GISS-E2-1-H (6)    | r[1-5]i1p1f2<br>r1i1p3f1                                       | r[1-5]i1p1f2<br>r1i1p3f1                                       | r[1-5]i1p1f2<br>r1i1p3f1                                       |
| GISS-E2-2-G (5)    | r[1-5]i1p3f1                                                   | r[1-5]i1p3f1                                                   | r[1-5]i1p3f1                                                   |
| Experiment ID      | ssp585                                                         |                                                                |                                                                |
| Variable           | hurs                                                           | pr                                                             | sfcWind                                                        |
| Model (# of runs)  | Variant Label                                                  | Variant Label                                                  | Variant Label                                                  |
| CESM2 (3)          | r4i1p1f1<br>r10i1p1f1<br>r11i1p1f1                             | r4i1p1f1<br>r10i1p1f1<br>r11i1p1f1                             | r4i1p1f1<br>r10i1p1f1<br>r11i1p1f1                             |
| CESM2-WACCM<br>(5) | r[1-5]i1p1f1                                                   | r[1-5]i1p1f1                                                   | r[1-5]i1p1f1                                                   |
| CNRM-ESM2-1<br>(5) | r[1-5]i1p1f1                                                   | r[1-5]i1p1f1                                                   | r[1-5]i1p1f1                                                   |
| GFDL-ESM4 (1)      | r1i1p1f1                                                       | r1i1p1f1                                                       | r1i1p1f1                                                       |
| NorESM2-LM (1)     | r1i1p1f1                                                       | r1i1p1f1                                                       | r1i1p1f1                                                       |
| UKESM1-0-LL<br>(5) | r[1-4]i1p1f2<br>r8i1p1f2                                       | r[1-4]i1p1f2<br>r8i1p1f2                                       | r[1-4]i1p1f2<br>r8i1p1f2                                       |
| INM-CM4-8 (1)      | r1i1p1f1                                                       | r1i1p1f1                                                       | r1i1p1f1                                                       |
| INM-CM5-0 (1)      | r1i1p1f1                                                       | r1i1p1f1                                                       | r1i1p1f1                                                       |
| MIROC6 (50)        | r[1-50]i1p1f1                                                  | r[1-50]i1p1f1                                                  | r[1-50]i1p1f1                                                  |
| MIROC-ES2L<br>(10) | r[1-10]i1p1f2                                                  | r[1-10]i1p1f2                                                  | r[1-10]i1p1f2                                                  |
| MRI-ESM2-0 (6)     | r[1-5]i1p1f1<br>r1i2p1f1                                       | r[1-5]i1p1f1<br>r1i2p1f1                                       | r[1-5]i1p1f1<br>r1i2p1f1                                       |
| GISS-E2-1-G (15)   | r[1-5]i1p1f2<br>r[1-5]i1p3f1<br>r[1-5]i1p5f1                   | r[1-5]i1p1f2<br>r[1-5]i1p3f1<br>r[1-5]i1p5f1                   | r[1-5]i1p1f2<br>r[1-5]i1p3f1<br>r[1-5]i1p5f1                   |
| GISS-E2-1-H (10)   | r[1-5]i1p1f2<br>r[1-5]i1p3f1                                   | r[1-5]i1p1f2<br>r[1-5]i1p3f1                                   | r[1-5]i1p1f2<br>r[1-5]i1p3f1                                   |
| GISS-E2-2-G (5)    | r[1-5]i1p3f1                                                   | r[1-5]i1p3f1                                                   | r[1-5]i1p3f1                                                   |
| Experiment ID      | historical                                                     |                                                                |                                                                |
| Variable           | od550aer                                                       | od550dust                                                      |                                                                |
| Model (# of runs)  | Variant Label                                                  | Variant Label                                                  |                                                                |
| CESM2 (11)         | r[1-11]i1p1f1                                                  | r[1-11]i1p1f1                                                  |                                                                |

|                     |                                                |                                               |
|---------------------|------------------------------------------------|-----------------------------------------------|
| CESM2-WACCM<br>(3)  | r[1-3]i1p1f1                                   | r[1-3]i1p1f1                                  |
| CNRM-ESM2-1<br>(9)  | r[1-3]i1p1f2<br>r[4-5]i1p1f2<br>r[8-11]i1p1f2  | r[1-3]i1p1f2<br>r[4-5]i1p1f2<br>r[8-11]i1p1f2 |
| GFDL-ESM4 (1)       | r1i1p1f1                                       | r1i1p1f1                                      |
| NorESM2-LM (1)      | r1i1p1f1                                       | r1i1p1f1                                      |
| UKESM1-0-LL<br>(19) | r[1-3]i1p1f2<br>r[4-19]i1p1f2                  | r[1-3]i1p1f2<br>r[4-19]i1p1f2                 |
| INM-CM4-8 (1)       | r1i1p1f1                                       | r1i1p1f1                                      |
| INM-CM5-0 (10)      | r[1-10]i1p1f1                                  | r[1-10]i1p1f1                                 |
| MIROC6 (10)         | r[1-10]i1p1f1                                  | r[1-10]i1p1f1                                 |
| MIROC-ES2L<br>(31)  | r[1-30]i1p1f2<br>r1i1000p1f2                   | r[1-30]i1p1f2<br>r1i1000p1f2                  |
| MRI-ESM2-0<br>(12)  | r[1-10]i1p1f1<br>r1i2p1f1<br>r1i1000p1f1       | r[1-10]i1p1f1<br>r1i2p1f1<br>r1i1000p1f1      |
| GISS-E2-1-G (19)    | r[1-10]i1p3f1<br>r[1-4]i1p5f1<br>r[6-10]i1p5f1 | r[1-10]i1p3f1                                 |
| GISS-E2-1-H (10)    | r[1-5]i1p3f1<br>r[1-5]i1p5f1                   | r[1-5]i1p3f1                                  |
| GISS-E2-2-G (5)     | r[1-5]i1p3f1                                   | r[1-5]i1p3f1                                  |

**Table S2.** The normalized standard deviations and correlation coefficients for individual models shown in Fig. 1

| Model       | Dust concentrations            |                         | AOD                            |                         |
|-------------|--------------------------------|-------------------------|--------------------------------|-------------------------|
|             | Normalized standard deviations | Correlation coefficient | Normalized standard deviations | Correlation coefficient |
| CESM2-WACCM | 0.78                           | 0.86                    | 0.87                           | 0.64                    |
| CESM2       | 0.74                           | 0.87                    | 0.89                           | 0.6                     |
| CNRM-ESM2-1 | 0.44                           | 0.85                    | 0.28                           | 0.79                    |
| GFDL-ESM4   | 0.54                           | 0.81                    | 0.59                           | 0.58                    |
| GISS-E2-1-G | 0.76                           | 0.83                    | 0.55                           | 0.67                    |
| GISS-E2-1-H | 0.62                           | 0.83                    | 0.51                           | 0.66                    |
| GISS-E2-2-G | 1.34                           | 0.84                    | 0.95                           | 0.61                    |
| INM-CM4-8   | 0.11                           | 0.49                    | 0.42                           | 0.44                    |
| INM-CM5-0   | 0.09                           | 0.30                    | 0.38                           | 0.26                    |
| MIROC-ES2L  | 0.24                           | 0.82                    | 0.64                           | 0.3                     |
| MIROC6      | 0.07                           | 0.86                    | 0.44                           | 0.64                    |
| MRI-ESM2-0  | 2.16                           | 0.86                    | 0.82                           | 0.33                    |
| NorESM2-LM  | 0.33                           | 0.82                    | 0.68                           | 0.63                    |
| UKESM1-0-LL | 1.03                           | 0.88                    | 0.36                           | 0.75                    |



**Table S3.** The summary of dust cycle at present day of selected models used in analysis<sup>a</sup>

| Region    | Model       | Emission           | Dry Deposition     | Wet Deposition     | Budget <sup>b</sup> |
|-----------|-------------|--------------------|--------------------|--------------------|---------------------|
|           |             | Tg a <sup>-1</sup> | Tg a <sup>-1</sup> | Tg a <sup>-1</sup> | Tg a <sup>-1</sup>  |
| Africa    | CESM2-WACCM | 1367               | 453                | 533                | 381                 |
|           | CESM2       | 1349               | 448                | 517                | 383                 |
|           | CNRM-ESM2-1 | 1931               | 1191               | 389                | 351                 |
|           | GFDL-ESM4   | 1311               | 873                | 177                | 260                 |
|           | GISS-E2-1-G | 946                | 462                | 202                | 282                 |
|           | GISS-E2-1-H | 890                | 426                | 204                | 261                 |
|           | GISS-E2-2-G | 1327               | 814                | 125                | 388                 |
|           | NorESM2-LM  | 1198               | 981                | 102                | 116                 |
|           | UKESM1-0-LL | 5289               | 4546               | 354                | 389                 |
| Asia      | CESM2-WACCM | 904                | 303                | 559                | 42                  |
|           | CESM2       | 942                | 315                | 590                | 37                  |
|           | CNRM-ESM2-1 | 487                | 308                | 224                | -45                 |
|           | GFDL-ESM4   | 720                | 519                | 230                | -29                 |
|           | GISS-E2-1-G | 388                | 196                | 197                | -5                  |
|           | GISS-E2-1-H | 382                | 189                | 197                | -3                  |
|           | GISS-E2-2-G | 537                | 367                | 185                | -14                 |
|           | NorESM2-LM  | 549                | 447                | 123                | -21                 |
|           | UKESM1-0-LL | 1937               | 1626               | 372                | -61                 |
| Australia | CESM2-WACCM | 53                 | 14                 | 23                 | 16                  |
|           | CESM2       | 78                 | 21                 | 33                 | 25                  |
|           | CNRM-ESM2-1 | 241                | 134                | 71                 | 35                  |
|           | GFDL-ESM4   | 155                | 88                 | 23                 | 43                  |
|           | GISS-E2-1-G | 41                 | 19                 | 12                 | 11                  |
|           | GISS-E2-1-H | 41                 | 18                 | 12                 | 11                  |

|         |             |     |     |    |      |
|---------|-------------|-----|-----|----|------|
|         | GISS-E2-2-G | 61  | 35  | 9  | 17   |
|         | NorESM2-LM  | 35  | 25  | 5  | 5    |
|         | UKESM1-0-LL | 814 | 703 | 77 | 34   |
| South   | CESM2-WACCM | 10  | 10  | 46 | -46  |
| America | CESM2       | 11  | 11  | 48 | -47  |
|         | CNRM-ESM2-1 | 18  | 15  | 14 | -11  |
|         | GFDL-ESM4   | 355 | 215 | 93 | 48   |
|         | GISS-E2-1-G | 16  | 14  | 38 | -36  |
|         | GISS-E2-1-H | 22  | 14  | 35 | -27  |
|         | GISS-E2-2-G | 23  | 25  | 54 | -56  |
|         | NorESM2-LM  | 10  | 9   | 11 | -10  |
|         | UKESM1-0-LL | 36  | 42  | 42 | -48  |
| North   | CESM2-WACCM | 2   | 25  | 78 | -100 |
| America | CESM2       | 2   | 26  | 77 | -101 |
|         | CNRM-ESM2-1 | 3   | 51  | 34 | -82  |
|         | GFDL-ESM4   | 46  | 69  | 59 | -81  |
|         | GISS-E2-1-G | 2   | 24  | 63 | -85  |
|         | GISS-E2-1-H | 1   | 20  | 56 | -75  |
|         | GISS-E2-2-G | 2   | 52  | 74 | -124 |
|         | NorESM2-LM  | 2   | 14  | 16 | -28  |
|         | UKESM1-0-LL | 82  | 117 | 72 | -107 |
| Europe  | CESM2-WACCM | 2   | 20  | 65 | -83  |
|         | CESM2       | 2   | 22  | 69 | -88  |
|         | CNRM-ESM2-1 | 2   | 12  | 52 | -63  |
|         | GFDL-ESM4   | 7   | 18  | 42 | -53  |
|         | GISS-E2-1-G | 4   | 8   | 44 | -48  |
|         | GISS-E2-1-H | 5   | 9   | 42 | -46  |
|         | GISS-E2-2-G | 5   | 15  | 36 | -46  |
|         | NorESM2-LM  | 9   | 16  | 14 | -21  |

|          |             |    |     |     |      |
|----------|-------------|----|-----|-----|------|
|          | UKESM1-0-LL | 10 | 18  | 40  | -48  |
| Pacific  | CESM2-WACCM |    | 6   | 46  | -52  |
| Ocean    | CESM2       |    | 7   | 53  | -60  |
|          | CNRM-ESM2-1 |    | 8   | 13  | -21  |
|          | GFDL-ESM4   |    | 41  | 72  | -113 |
|          | GISS-E2-1-G | /  | 9   | 44  | -53  |
|          | GISS-E2-1-H |    | 9   | 40  | -49  |
|          | GISS-E2-2-G |    | 29  | 86  | -115 |
|          | NorESM2-LM  |    | 4   | 14  | -19  |
|          | UKESM1-0-LL |    | 11  | 67  | -78  |
| Indian   | CESM2-WACCM |    | 33  | 126 | -160 |
| Ocean    | CESM2       |    | 36  | 131 | -167 |
|          | CNRM-ESM2-1 |    | 72  | 72  | -144 |
|          | GFDL-ESM4   |    | 71  | 70  | -141 |
|          | GISS-E2-1-G | /  | 19  | 39  | -57  |
|          | GISS-E2-1-H |    | 20  | 44  | -64  |
|          | GISS-E2-2-G |    | 37  | 37  | -74  |
|          | NorESM2-LM  |    | 41  | 30  | -70  |
|          | UKESM1-0-LL |    | 87  | 91  | -178 |
| Atlantic | CESM2-WACCM |    | 68  | 243 | -311 |
| Ocean    | CESM2       |    | 70  | 243 | -313 |
|          | CNRM-ESM2-1 |    | 162 | 124 | -285 |
|          | GFDL-ESM4   |    | 133 | 162 | -295 |
|          | GISS-E2-1-G | /  | 54  | 146 | -200 |
|          | GISS-E2-1-H |    | 47  | 141 | -188 |
|          | GISS-E2-2-G |    | 106 | 121 | -227 |
|          | NorESM2-LM  |    | 79  | 51  | -130 |
|          | UKESM1-0-LL |    | 139 | 163 | -302 |
| Arctic   | CESM2-WACCM | /  | 0.4 | 4   | -5   |

|       |             |     |   |    |
|-------|-------------|-----|---|----|
| Ocean | CESM2       | 0.5 | 4 | -5 |
|       | CNRM-ESM2-1 | 0.5 | 1 | -1 |
|       | GFDL-ESM4   | 0.4 | 3 | -3 |
|       | GISS-E2-1-G | 0.3 | 2 | -2 |
|       | GISS-E2-1-H | 0.2 | 2 | -2 |
|       | GISS-E2-2-G | 1.4 | 3 | -5 |
|       | NorESM2-LM  | 0.1 | 1 | -1 |
|       | UKESM1-0-LL | 0.2 | 2 | -2 |

---

<sup>a</sup> Please notice that the median values in Table 3 are derived as the regional total of gridded median results from CMIP6 models, and are different from the median values of the regional total from CMIP6 models shown above.

<sup>b</sup> Budget = Emission - Dry Deposition - Wet Deposition

**Table S4.** Multi-model ensemble projection of absolute (Gg) and relative changes (%) in dust column load by the end of 21<sup>st</sup> century (2090-2099)

| Region*/ Scenario | SSP126      |          | SSP245      |          | SSP370       |          | SSP585      |          |
|-------------------|-------------|----------|-------------|----------|--------------|----------|-------------|----------|
|                   | Absolute    | Relative | Absolute    | Relative | Absolute     | Relative | Absolute    | Relative |
| NAF               | 77.2±274.1  | 1.6      | 217.3±293.7 | 4.4      | 162.5±325.7  | 3.3      | 668.3±458.1 | 13.5     |
| TGD               | -3.9±60.0   | -0.6     | -26.1±162.6 | -4.0     | -54.7±195.9  | -8.3     | -43.6±199.5 | -6.6     |
| MEWA              | -37.2±229.3 | -1.5     | -61.5±335.0 | -2.5     | -130.4±414.0 | -5.3     | 64.2±503.4  | 2.6      |
| AUS               | 10.7±55.0   | 4.5      | 28.9±66.6   | 12.3     | 22.3±77.0    | 9.5      | 65.8±84.6   | 28.0     |
| NAM               | 0.5±17.3    | 3.4      | 0.1±19.0    | 1.1      | 0.1±20.0     | 1.0      | 0.8±20.9    | 5.7      |
| SAM               | 2.9±97.9    | 10.1     | 3.8±124.9   | 13.4     | 1.6±87.6     | 5.5      | 1.3±75.0    | 4.7      |
| SAF               | 1.3±19.9    | 2.2      | 7.5±25.5    | 13.3     | 21.6±113.0   | 38.3     | 10.2±62.8   | 18.0     |
| SAS               | 11.4±96.2   | 1.9      | -13.9±86.0  | -2.3     | -42.2±105.3  | -6.9     | 7.6±134.5   | 1.3      |
| EAS               | -4.0±52.2   | -1.3     | -6.3±63.1   | -2.0     | -32.6±75.2   | -10.5    | -20.6±79.6  | -6.6     |

\* The domain of each region is shown in Fig. 4a and Fig. 8a.



**Table S5.** Multi-model ensemble projection of the absolute ( $\text{Tg a}^{-1}$ ) and relative changes (%) in dust emissions by the end of this century (2090-2099) at vegetation-free grid points

| Region* | SSP1-2.6   |          | SSP2-4.5  |          | SSP3-7.0  |          | SSP5-8.5   |          |
|---------|------------|----------|-----------|----------|-----------|----------|------------|----------|
|         | Absolute   | Relative | Absolute  | Relative | Absolute  | Relative | Absolute   | Relative |
| NAF     | 10.1±121.7 | 1.2      | 5.8±131.5 | 0.7      | 4.2±174.1 | 0.5      | 47.4±178.9 | 5.6      |
| TGD     | -0.4±23.5  | -0.8     | -2.5±41.3 | -4.9     | -6.2±53.6 | -11.9    | -4.6±55.7  | -8.9     |
| MEWA    | -0.7±43.1  | -0.3     | -4.5±66.4 | -1.8     | -4.4±81.0 | -1.8     | 6.8±87.2   | 2.7      |
| AUS     | 1.2±16.9   | 2.9      | 2.0±20.5  | 5.1      | -0.1±47.2 | -0.3     | 4.3±51.6   | 10.7     |
| NAM     | 0.03±4.7   | 2.2      | 0.02±6.1  | 1.3      | 0.01±5.4  | 0.8      | 0.02±5.7   | 1.4      |
| SAM     | 0.01±32.3  | 0.2      | 0.4±42.1  | 6.7      | -0.1±31.2 | -2.1     | -0.4±27.7  | -6.2     |
| SAF     | 0.2±4.1    | 2.3      | 0.5±4.1   | 6.1      | 0.7±10.6  | 9.0      | 0.9±5.0    | 11.4     |

\* The domain of each region is shown in Fig. 4a

**Table S6.** Multi-model ensemble projection of the absolute ( $\text{Tg a}^{-1}$ ) and relative changes (%) in dust emissions by the end of this century (2090-2099) using all 14 CMIP6 models

| Region* | SSP1-2.6         |          | SSP2-4.5         |          | SSP3-7.0         |          | SSP5-8.5         |          |
|---------|------------------|----------|------------------|----------|------------------|----------|------------------|----------|
|         | Absolute         | Relative | Absolute         | Relative | Absolute         | Relative | Absolute         | Relative |
|         | median $\pm$ SD  |          | median $\pm$ SD  |          | median $\pm$ SD  |          | median $\pm$ SD  |          |
| NAF     | 10.3 $\pm$ 131.5 | 1.4      | 15.8 $\pm$ 159.9 | 2.2      | 19.5 $\pm$ 181.6 | 2.7      | 48.0 $\pm$ 215.2 | 6.6      |
| TGD     | 0.6 $\pm$ 32.3   | 1.1      | -1.4 $\pm$ 37.9  | -2.9     | -4.8 $\pm$ 50.6  | -9.6     | -3.5 $\pm$ 54.0  | -6.9     |
| MEWA    | 1.8 $\pm$ 68.4   | 0.9      | 0.6 $\pm$ 69.7   | 0.3      | -1.7 $\pm$ 68.1  | -0.8     | 5.6 $\pm$ 93.8   | 2.8      |
| AUS     | -0.6 $\pm$ 15.5  | -1.3     | 0.2 $\pm$ 26.5   | 0.4      | -0.3 $\pm$ 49.4  | -0.7     | 1.9 $\pm$ 52.7   | 4.3      |
| NAM     | 0.03 $\pm$ 3.9   | 1.8      | 0.02 $\pm$ 5.2   | 1.3      | 0.02 $\pm$ 5.4   | 1.6      | 0.04 $\pm$ 6.3   | 2.6      |
| SAM     | 0.4 $\pm$ 30.6   | 5.0      | 0.6 $\pm$ 47.6   | 7.2      | 0.2 $\pm$ 58.6   | 1.9      | 0.1 $\pm$ 84.5   | 0.9      |
| SAF     | 0.02 $\pm$ 4.6   | 0.2      | 0.7 $\pm$ 5.2    | 7.8      | 1.3 $\pm$ 10.2   | 13.8     | 1.5 $\pm$ 7.8    | 15.9     |

\* The domain of each region is shown in Fig. 4a

**Table S7.** The information of all available CMIP6 models for climate projection

| Model         | Resolution    | Model            | Resolution    | Model         | Resolution    |
|---------------|---------------|------------------|---------------|---------------|---------------|
| ACCESS-CM2    | 1.875°×1.24°  | EC-Earth3-Veg-LR | 1.125°×1.125° | MPI-ESM1-2-LR | 1.875°×1.875° |
| ACCESS-ESM1-5 | 1.875°×1.24°  | FGOALS-f3-L      | 1°×1°         | MRI-ESM2-0    | 1.125°×1.125° |
| AWI-CM-1-1-MR | 0.94°×0.94°   | FGOALS-g3        | 2°×2°         | NorESM2-LM    | 2.5°×1.875°   |
| BCC-CSM2-MR   | 1.125°×1.125° | GFDL-ESM4        | 1°×1°         | NorESM2-MM    | 1.91°×0.94°   |
| CAMS-CSM1-0   | 1.125°×1.125° | IITM-ESM         | 1.875°×1.91°  | TaiESM1       | 1.25°×0.94°   |
| CAS-ESM2-0    | 1.4°×1.4°     | INM-CM4-8        | 2°×1.5°       | CNRM-CM6-1    | 0.5°×0.5°     |
| CESM2-WACCM   | 1.25°×0.94°   | INM-CM5-0        | 2°×1.5°       | CNRM-CM6-1-HR | 0.5°×0.5°     |
| CMCC-CM2-SR5  | 1.25°×0.94°   | IPSL-CM6A-LR     | 2.5°×1.26°    | CNRM-ESM2-1   | 1.4°×1.4°     |
| CMCC-ESM2     | 1.25°×0.94°   | KACE-1-0-G       | 1.875°×1.25°  | MIROC-ES2L    | 2.8°×2.8°     |
| CanESM5       | 2.8°×2.8°     | MIROC6           | 1.4°×1.4°     | UKESM1-0-LL   | 1.875°×1.25°  |
| EC-Earth3     | 0.7°×0.7°     | MPI-ESM1-2-HR    | 0.94°×0.94°   | /             | /             |
